# Supplementary material for: ‘MOVEdiabetes’: a cluster randomized controlled trial to increase physical activity in adults with type 2 diabetes in primary health in Oman
Source: PubMed Central journal article supplement — BMJ Open Diabetes Res Care. 2018 Oct 31;6(1):e000605. doi: 10.1136/bmjdrc-2018-000605 (PMC6235057; doi:10.1136/bmjdrc-2018-000605), 2018-10-31
Supplement: bmjdrc-2018-000605supp001.pdf [file bmjdrc-2018-000605supp001.pdf]

*Sultanate of Oman*  
*Ministry of Health*  
*Directorate General of Planning*  
*and Studies*

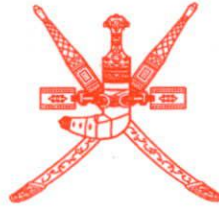

سلطنة عمان  
وزارة الصحة  
المديرية العامة للتخطيط  
والدراسات

Ref. : MH/DGP/R&S/PROPOSAL\_APPROVED/1/2016

Date : 05.1.2016

الرقم :  
التاريخ :  
الموافق :

**Dr. Thamra Al-Ghafri**  
Principal Investigator

Study Title: "“MOVEdiabetes” A Trial to Promote Physical Activity for Adults with Type 2 Diabetes in Primary Health Care in Oman ”.

After compliments

We are pleased to inform you that your research proposal " “MOVEdiabetes” A Trial to Promote Physical Activity for Adults with Type 2 Diabetes in Primary Health Care in Oman " has been approved by Research and Ethical Review & Approve Committee, Ministry of Health.

Regards,

٤٠١٦/١٥

**Dr. Ahmed Mohamed Al Qasbi**  
Director General of Planning and Studies  
Chairman, Research and Ethical Review and Approve Committee  
Ministry of Health, Sultanate of Oman.

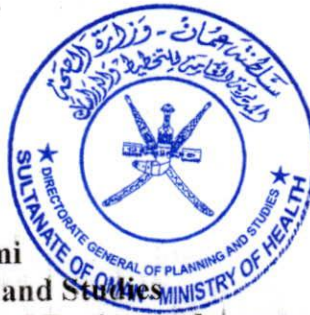

Cc  
Day file
